# Supplementary material for: Demographic histories and genetic diversities of Fennoscandian marine and landlocked ringed seal subspecies
Source: PubMed Central journal article supplement (PMC4228616; doi:10.1002/ece3.1193), 2014-08-19
Supplement: ece30004-3420-sd1.pdf [file ece30004-3420-sd1.pdf]

## **Supporting Information (Nyman *et al.*)**

**Appendix S1.** Supplementary tables and figures.

**Table S1** Mutation-model priors used for microsatellite loci and mitochondrial control-region sequences in the ABC analyses

| Marker, parameter                                                               | Interpretation                                                                                     | Distribution | Minimum | Maximum | Mean        | Shape parameter |
|---------------------------------------------------------------------------------|----------------------------------------------------------------------------------------------------|--------------|---------|---------|-------------|-----------------|
| <b>Microsatellites</b>                                                          |                                                                                                    |              |         |         |             |                 |
| $\mu$                                                                           | Mean mutation rate                                                                                 | Uniform      | 1E-5    | 1E-3    |             |                 |
| $\mu_i$                                                                         | Individual locus mutation rate                                                                     | Gamma        | 1E-6    | 1E-2    | $\mu$       | 2               |
| P                                                                               | Mean parameter of the geometric distribution of the change in number of repeats at mutation events | Uniform      | 0.1     | 0.3     |             |                 |
| Pi                                                                              | Individual locus P                                                                                 | Gamma        | 0.01    | 0.9     | P           | 2               |
| $\mu_{SNI}$                                                                     | Mean single nucleotide insertion/deletion rate                                                     | Log-uniform  | 1E-8    | 1E-4    |             |                 |
| $\mu_{SNIi}$                                                                    | Individual locus single nucleotide insertion/deletion rate                                         | Gamma        | 1E-9    | 1E-3    | $\mu_{SNI}$ | 2               |
| <b>mtDNA control-region sequences (substitution model = HKY+I[88%]+G[1.40])</b> |                                                                                                    |              |         |         |             |                 |
| $\mu_{SEQ}$                                                                     | Mean mutation rate per site per generation                                                         | Uniform      | 1E-8    | 1E-5    |             |                 |
| $\mu_{SEQi}$                                                                    | Individual locus mutation rate (not needed)                                                        | Uniform      | 1E-9    | 1E-4    | $\mu_{SEQ}$ | 2               |
| k                                                                               | Mean coefficient kappa (transition-transversion bias)                                              | Uniform      | 0.05    | 20      |             |                 |
| ki                                                                              | Individual locus coefficient kappa (not needed)                                                    | Uniform      | 0.05    | 20      | k           | 2               |

**Table S2** Target summary statistics used during ABC simulations and model-checking analyses

| Loci and summary statistics                                   | Simulations | Model checking |
|---------------------------------------------------------------|-------------|----------------|
| <b>Microsatellite loci</b>                                    |             |                |
| <b>One-sample summary statistics</b>                          |             |                |
| Mean number of alleles                                        | x           |                |
| Mean genic diversity (expected heterozygosity)                | x           |                |
| Mean allele size variance                                     |             | x              |
| Mean Garza-Williamson's <i>M</i>                              | x           |                |
| <b>Two-sample summary statistics</b>                          |             |                |
| Mean number of alleles                                        | x           |                |
| Mean genic diversity (expected heterozygosity)                |             | x              |
| Mean allele size variance                                     |             | x              |
| <i>F</i> <sub>st</sub>                                        | x           |                |
| Classification index (assignment likelihood)                  | x           |                |
| Shared allele distance                                        |             | x              |
| ( <i>d</i> <sub>u</sub> ) <sup>2</sup> distance               |             | x              |
| <b>Mitochondrial control-region sequences</b>                 |             |                |
| <b>One-sample summary statistics</b>                          |             |                |
| Number of haplotypes                                          | x           |                |
| Number of segregating sites                                   | x           |                |
| Mean of pairwise differences                                  | x           |                |
| Variance of pairwise differences                              | x           |                |
| Tajima's <i>D</i>                                             |             | x              |
| Private segregating sites                                     |             | x              |
| Mean of numbers of the rarest nucleotide at segregating sites |             | x              |
| <b>Two-sample summary statistics</b>                          |             |                |
| Number of haplotypes                                          | x           |                |
| Number of segregating sites                                   | x           |                |
| Mean of pairwise differences (W)                              |             | x              |
| Mean of pairwise differences (B)                              |             | x              |
| <i>F</i> <sub>st</sub>                                        | x           |                |

**Table S3** Observed and estimated microsatellite allele frequencies in ringed seals from Lake Saimaa ( $N = 172$ ), the Baltic Sea ( $N = 21$ ), and Lake Ladoga ( $N = 16$ )

| Locus        | Allele size   | Lake Saimaa |           | Baltic Sea |           | Lake Ladoga |           |       |
|--------------|---------------|-------------|-----------|------------|-----------|-------------|-----------|-------|
|              |               | Observed    | Estimated | Observed   | Estimated | Observed    | Estimated |       |
| <i>Hg1.4</i> | 185           | 0.012       | 0.009     | 0.175      | 0.112     | –           | –         |       |
|              | 186           | –           | –         | –          | –         | 0.063       | 0.063     |       |
|              | 187           | –           | –         | 0.600      | 0.445     | 0.219       | 0.171     |       |
|              | 188           | –           | –         | –          | –         | 0.188       | 0.109     |       |
|              | 189           | –           | –         | 0.100      | 0.054     | 0.281       | 0.214     |       |
|              | 190           | –           | –         | –          | –         | 0.063       | 0.033     |       |
|              | 191           | 0.988       | 0.942     | 0.075      | 0.052     | 0.156       | 0.104     |       |
|              | 193           | –           | –         | 0.025      | 0.025     | –           | –         |       |
|              | 195           | –           | –         | –          | –         | 0.031       | 0.031     |       |
|              | 197           | –           | –         | 0.025      | 0.025     | –           | –         |       |
|              | 0             | –           | 0.049     | –          | 0.286     | –           | 0.276     |       |
|              | <i>Hg2.3</i>  | 110         | –         | –          | 0.143     | 0.133       | 0.031     | 0.031 |
|              |               | 114         | 0.172     | 0.167      | 0.071     | 0.071       | 0.219     | 0.187 |
| 116          |               | –           | –         | 0.071      | 0.071     | 0.063       | 0.063     |       |
| 118          |               | –           | –         | 0.190      | 0.174     | –           | –         |       |
| 120          |               | –           | –         | 0.048      | 0.048     | 0.156       | 0.138     |       |
| 122          |               | –           | –         | 0.095      | 0.095     | 0.063       | 0.063     |       |
| 124          |               | 0.828       | 0.808     | 0.143      | 0.122     | 0.375       | 0.329     |       |
| 126          |               | –           | –         | –          | –         | 0.063       | 0.063     |       |
| 128          |               | –           | –         | 0.119      | 0.119     | –           | –         |       |
| 130          |               | –           | –         | 0.048      | 0.048     | –           | –         |       |
| 132          |               | –           | –         | 0.024      | 0.024     | 0.031       | 0.031     |       |
| 134          |               | –           | –         | 0.024      | 0.024     | –           | –         |       |
| 136          |               | –           | –         | 0.024      | 0.024     | –           | –         |       |
| 0            | –             | 0.025       | –         | 0.048      | –         | 0.096       |           |       |
| <i>Hg3.6</i> | 94            | –           | –         | 0.111      | 0.063     | –           | –         |       |
|              | 96            | –           | –         | 0.444      | 0.369     | 0.094       | 0.067     |       |
|              | 98            | 0.061       | 0.061     | 0.056      | 0.056     | 0.063       | 0.063     |       |
|              | 100           | 0.366       | 0.346     | 0.139      | 0.117     | 0.125       | 0.125     |       |
|              | 102           | –           | –         | 0.139      | 0.093     | 0.094       | 0.067     |       |
|              | 104           | 0.573       | 0.546     | 0.028      | 0.028     | 0.063       | 0.034     |       |
|              | 106           | –           | –         | –          | –         | 0.031       | 0.031     |       |
|              | 108           | –           | –         | 0.028      | 0.028     | 0.531       | 0.431     |       |
|              | 110           | –           | –         | 0.056      | 0.030     | –           | –         |       |
|              | 0             | –           | 0.047     | –          | 0.217     | –           | 0.181     |       |
|              | <i>Hg4.2</i>  | 132         | –         | –          | –         | –           | 0.094     | 0.094 |
|              |               | 134         | 0.384     | 0.368      | 0.286     | 0.286       | 0.344     | 0.344 |
|              |               | 140         | –         | –          | 0.071     | 0.071       | 0.031     | 0.031 |
| 142          |               | –           | –         | 0.024      | 0.024     | 0.063       | 0.063     |       |
| 144          |               | –           | –         | 0.048      | 0.048     | –           | –         |       |
| 148          |               | –           | –         | 0.048      | 0.048     | 0.031       | 0.031     |       |
| 150          |               | –           | –         | 0.048      | 0.048     | 0.063       | 0.063     |       |
| 152          |               | –           | –         | 0.048      | 0.048     | –           | –         |       |
| 154          |               | –           | –         | 0.214      | 0.214     | 0.063       | 0.063     |       |
| 156          |               | –           | –         | 0.071      | 0.071     | 0.281       | 0.281     |       |
| 157          |               | –           | –         | –          | –         | 0.031       | 0.031     |       |
| 160          |               | –           | –         | 0.095      | 0.095     | –           | –         |       |
| 161          |               | 0.549       | 0.523     | –          | –         | –           | –         |       |
| 163          | 0.067         | 0.055       | –         | –          | –         | –           |           |       |
| 165          | –             | –           | 0.024     | 0.024      | –         | –           |           |       |
| 169          | –             | –           | 0.024     | 0.024      | –         | –           |           |       |
| 0            | –             | 0.053       | –         | 0.000      | –         | 0.000       |           |       |
| <i>Hg6.1</i> | 146           | –           | –         | 0.024      | 0.024     | 0.063       | 0.063     |       |
|              | 148           | 0.023       | 0.021     | 0.024      | 0.024     | –           | –         |       |
|              | 150           | –           | –         | –          | –         | 0.125       | 0.125     |       |
|              | 152           | 0.977       | 0.940     | 0.310      | 0.310     | 0.375       | 0.375     |       |
|              | 154           | –           | –         | 0.024      | 0.024     | –           | –         |       |
|              | 156           | –           | –         | –          | –         | 0.031       | 0.031     |       |
|              | 158           | –           | –         | 0.119      | 0.119     | 0.063       | 0.063     |       |
|              | 160           | –           | –         | 0.048      | 0.048     | 0.063       | 0.063     |       |
|              | 162           | –           | –         | 0.119      | 0.119     | –           | –         |       |
|              | 164           | –           | –         | –          | –         | 0.063       | 0.063     |       |
|              | 166           | –           | –         | 0.048      | 0.048     | –           | –         |       |
|              | 167           | –           | –         | 0.119      | 0.119     | –           | –         |       |
|              | 171           | –           | –         | 0.024      | 0.024     | 0.031       | 0.031     |       |
| 173          | –             | –           | 0.024     | 0.024      | 0.094     | 0.094       |           |       |
| 174          | –             | –           | 0.048     | 0.048      | –         | –           |           |       |
| 176          | –             | –           | 0.024     | 0.024      | –         | –           |           |       |
| 178          | –             | –           | 0.048     | 0.048      | 0.063     | 0.063       |           |       |
| 180          | –             | –           | –         | –          | 0.031     | 0.031       |           |       |
| 0            | –             | 0.040       | –         | 0.000      | –         | 0.000       |           |       |
| <i>Hg8.9</i> | 188           | –           | –         | –          | –         | 0.156       | 0.156     |       |
|              | 190           | –           | –         | 0.071      | 0.071     | 0.219       | 0.219     |       |
|              | 192           | –           | –         | 0.095      | 0.095     | 0.031       | 0.031     |       |
|              | 194           | 0.073       | 0.069     | 0.381      | 0.381     | 0.219       | 0.219     |       |
|              | 196           | –           | –         | 0.119      | 0.119     | 0.063       | 0.063     |       |
|              | 198           | –           | –         | –          | –         | 0.063       | 0.063     |       |
|              | 200           | 0.372       | 0.345     | 0.024      | 0.024     | 0.063       | 0.063     |       |
|              | 202           | 0.555       | 0.517     | 0.048      | 0.048     | 0.031       | 0.031     |       |
|              | 204           | –           | –         | 0.143      | 0.143     | 0.125       | 0.125     |       |
|              | 206           | –           | –         | 0.095      | 0.095     | –           | –         |       |
|              | 208           | –           | –         | 0.024      | 0.024     | 0.031       | 0.031     |       |
|              | 0             | –           | 0.069     | –          | 0.000     | –           | 0.000     |       |
|              | <i>Hg8.10</i> | 180         | –         | –          | 0.025     | 0.025       | –         | –     |
| 184          |               | –           | –         | 0.075      | 0.075     | 0.031       | 0.031     |       |
| 186          |               | 0.828       | 0.828     | 0.450      | 0.450     | 0.625       | 0.625     |       |
| 188          |               | 0.172       | 0.172     | 0.350      | 0.350     | 0.281       | 0.281     |       |
| 190          |               | –           | –         | –          | –         | 0.063       | 0.063     |       |
| 192          |               | –           | –         | 0.050      | 0.050     | –           | –         |       |
| 194          |               | –           | –         | 0.050      | 0.050     | –           | –         |       |
| 0            |               | –           | 0.000     | –          | 0.000     | –           | 0.000     |       |
| <i>Hgdii</i> |               | 200         | 0.924     | 0.869      | 0.167     | 0.167       | 0.313     | 0.306 |
|              |               | 206         | –         | –          | 0.024     | 0.024       | –         | –     |
|              |               | 208         | –         | –          | 0.095     | 0.095       | 0.094     | 0.094 |
|              |               | 214         | –         | –          | 0.119     | 0.119       | 0.031     | 0.031 |
|              |               | 216         | –         | –          | 0.119     | 0.119       | –         | –     |
|              | 218           | –           | –         | 0.357      | 0.357     | 0.219       | 0.219     |       |
|              | 220           | 0.009       | 0.009     | 0.095      | 0.095     | 0.156       | 0.151     |       |
|              | 222           | –           | –         | 0.024      | 0.024     | 0.188       | 0.183     |       |
|              | 228           | 0.067       | 0.059     | –          | –         | –           | –         |       |
|              | 0             | –           | 0.064     | –          | 0.000     | –           | 0.016     |       |

**Table S3** (Continued)

| Locus         | Allele size   | Lake Saimaa |           | Baltic Sea |           | Lake Ladoga |           |       |
|---------------|---------------|-------------|-----------|------------|-----------|-------------|-----------|-------|
|               |               | Observed    | Estimated | Observed   | Estimated | Observed    | Estimated |       |
| <i>Hh15</i>   | 129           | 0.070       | 0.069     | 0.024      | 0.024     | 0.156       | 0.156     |       |
|               | 131           | –           | –         | 0.024      | 0.024     | –           | –         |       |
|               | 133           | 0.003       | 0.003     | 0.024      | 0.024     | –           | –         |       |
|               | 135           | 0.006       | 0.006     | 0.024      | 0.024     | –           | –         |       |
|               | 137           | 0.488       | 0.481     | 0.024      | 0.024     | –           | –         |       |
|               | 139           | 0.026       | 0.026     | –          | –         | –           | –         |       |
|               | 141           | –           | –         | –          | –         | 0.031       | 0.031     |       |
|               | 143           | –           | –         | –          | –         | 0.031       | 0.031     |       |
|               | 145           | –           | –         | 0.071      | 0.071     | 0.031       | 0.031     |       |
|               | 147           | –           | –         | –          | –         | 0.063       | 0.063     |       |
|               | 149           | –           | –         | 0.119      | 0.119     | –           | –         |       |
|               | 151           | 0.015       | 0.015     | 0.048      | 0.048     | 0.063       | 0.063     |       |
|               | 153           | 0.070       | 0.070     | 0.119      | 0.119     | 0.125       | 0.125     |       |
| 155           | 0.061         | 0.061       | 0.167     | 0.167      | 0.125     | 0.125       |           |       |
| 157           | 0.015         | 0.015       | 0.119     | 0.119      | 0.094     | 0.094       |           |       |
| 159           | 0.067         | 0.065       | 0.071     | 0.071      | 0.063     | 0.063       |           |       |
| 161           | 0.012         | 0.012       | 0.119     | 0.119      | 0.063     | 0.063       |           |       |
| 163           | 0.006         | 0.006       | 0.024     | 0.024      | 0.063     | 0.063       |           |       |
| 165           | 0.061         | 0.061       | –         | –          | –         | –           |           |       |
| 167           | 0.079         | 0.079       | 0.024     | 0.024      | 0.031     | 0.031       |           |       |
| 169           | 0.018         | 0.016       | –         | –          | 0.031     | 0.031       |           |       |
| 171           | 0.003         | 0.003       | –         | –          | 0.031     | 0.031       |           |       |
| 0             | –             | 0.012       | –         | 0.000      | –         | 0.000       |           |       |
| <i>Pvc19</i>  | 104           | –           | –         | 0.024      | 0.024     | –           | –         |       |
|               | 106           | –           | –         | 0.024      | 0.024     | 0.031       | 0.031     |       |
|               | 108           | 0.105       | 0.104     | 0.071      | 0.071     | –           | –         |       |
|               | 110           | –           | –         | 0.238      | 0.238     | 0.219       | 0.219     |       |
|               | 112           | 0.221       | 0.217     | 0.048      | 0.048     | 0.031       | 0.031     |       |
|               | 114           | –           | –         | 0.024      | 0.024     | 0.031       | 0.031     |       |
|               | 116           | 0.006       | 0.006     | 0.048      | 0.048     | 0.063       | 0.063     |       |
|               | 118           | 0.669       | 0.660     | 0.405      | 0.405     | 0.531       | 0.531     |       |
|               | 120           | –           | –         | 0.071      | 0.071     | 0.094       | 0.094     |       |
|               | 122           | –           | –         | 0.048      | 0.048     | –           | –         |       |
|               | 0             | –           | 0.013     | –          | 0.000     | –           | 0.000     |       |
|               | <i>Pvc26</i>  | 103         | 0.003     | 0.003      | 0.214     | 0.214       | 0.031     | 0.031 |
|               |               | 105         | 0.009     | 0.006      | 0.310     | 0.309       | 0.500     | 0.500 |
| 107           |               | –           | –         | 0.381      | 0.381     | 0.406       | 0.406     |       |
| 109           |               | 0.866       | 0.843     | 0.095      | 0.095     | 0.063       | 0.063     |       |
| 111           |               | 0.123       | 0.121     | –          | –         | –           | –         |       |
| 0             |               | –           | 0.027     | –          | 0.001     | –           | 0.000     |       |
| <i>Pvc30</i>  |               | 167         | –         | –          | –         | –           | 0.031     | 0.031 |
|               |               | 171         | 0.347     | 0.344      | 0.238     | 0.238       | 0.219     | 0.212 |
|               |               | 173         | –         | –          | –         | –           | 0.063     | 0.063 |
|               |               | 177         | 0.065     | 0.065      | –         | –           | 0.063     | 0.063 |
|               |               | 179         | 0.106     | 0.105      | 0.238     | 0.238       | 0.125     | 0.125 |
|               |               | 181         | 0.482     | 0.479      | 0.143     | 0.143       | –         | –     |
|               |               | 183         | –         | –          | 0.024     | 0.024       | –         | –     |
|               | 185           | –           | –         | 0.238      | 0.238     | 0.344       | 0.334     |       |
|               | 187           | –           | –         | 0.095      | 0.095     | 0.094       | 0.081     |       |
|               | 189           | –           | –         | 0.024      | 0.024     | 0.063       | 0.063     |       |
|               | 0             | –           | 0.007     | –          | 0.000     | –           | 0.029     |       |
|               | <i>Pvc78</i>  | 137         | –         | –          | 0.400     | 0.400       | 0.094     | 0.094 |
|               |               | 139         | 0.172     | 0.153      | 0.375     | 0.375       | 0.500     | 0.500 |
| 141           |               | –           | –         | 0.025      | 0.025     | 0.125       | 0.125     |       |
| 143           |               | –           | –         | 0.075      | 0.075     | 0.031       | 0.031     |       |
| 145           |               | –           | –         | 0.075      | 0.075     | –           | –         |       |
| 147           |               | –           | –         | 0.050      | 0.050     | 0.031       | 0.031     |       |
| 149           |               | 0.828       | 0.764     | –          | –         | 0.219       | 0.219     |       |
| 0             |               | –           | 0.083     | –          | 0.000     | –           | 0.000     |       |
| <i>SGPv9</i>  |               | 161         | 0.904     | 0.904      | 0.429     | 0.422       | 0.875     | 0.875 |
|               |               | 163         | –         | –          | 0.024     | 0.024       | –         | –     |
|               |               | 165         | –         | –          | 0.024     | 0.024       | 0.031     | 0.031 |
|               |               | 167         | –         | –          | 0.071     | 0.071       | 0.031     | 0.031 |
|               |               | 169         | –         | –          | –         | –           | 0.031     | 0.031 |
|               | 171           | 0.096       | 0.096     | 0.238      | 0.235     | 0.031       | 0.031     |       |
|               | 173           | –           | –         | 0.214      | 0.208     | –           | –         |       |
|               | 0             | –           | 0.000     | –          | 0.015     | –           | 0.000     |       |
|               | <i>SGPv10</i> | 131         | –         | –          | 0.024     | 0.024       | –         | –     |
|               |               | 133         | 0.317     | 0.317      | –         | –           | –         | –     |
|               |               | 135         | –         | –          | 0.024     | 0.024       | 0.094     | 0.094 |
|               |               | 137         | –         | –          | 0.071     | 0.071       | –         | –     |
|               |               | 139         | –         | –          | 0.024     | 0.024       | 0.156     | 0.156 |
| 141           |               | –           | –         | 0.310      | 0.295     | 0.313       | 0.310     |       |
| 143           |               | –           | –         | 0.119      | 0.119     | 0.063       | 0.063     |       |
| 145           |               | 0.683       | 0.683     | 0.024      | 0.024     | 0.094       | 0.094     |       |
| 147           |               | –           | –         | 0.214      | 0.208     | 0.063       | 0.053     |       |
| 149           |               | –           | –         | –          | –         | 0.031       | 0.031     |       |
| 151           |               | –           | –         | 0.024      | 0.024     | 0.063       | 0.063     |       |
| 153           |               | –           | –         | 0.119      | 0.119     | 0.094       | 0.094     |       |
| 155           |               | –           | –         | 0.048      | 0.031     | –           | –         |       |
| 157           | –             | –           | –         | –          | 0.031     | 0.031       |           |       |
| 0             | –             | 0.000       | –         | 0.038      | –         | 0.012       |           |       |
| <i>SGPv11</i> | 152           | –           | –         | 0.071      | 0.071     | 0.063       | 0.063     |       |
|               | 154           |             |           |            |           |             |           |       |

**Table S4** Genetic diversity of the Baltic, Ladoga, and Saimaa ringed seal subspecies at 17 microsatellite loci:  $N$  = sample size,  $A$  = number of alleles,  $r$  = estimated null allele frequency,  $H_O$  = observed heterozygosity,  $H_E$  = expected heterozygosity; (uncorrected)  $P$ -values in bold indicate significant deviations from Hardy-Weinberg equilibrium

| Population         | Locus        |       |              |              |       |              |        |              |              |       |              |       |              |       |        |        |        | Mean  |
|--------------------|--------------|-------|--------------|--------------|-------|--------------|--------|--------------|--------------|-------|--------------|-------|--------------|-------|--------|--------|--------|-------|
|                    | Hg1.4        | Hg2.3 | Hg3.6        | Hg4.2        | Hg6.1 | Hg8.9        | Hg8.10 | Hgdii        | Hl15         | Pvc19 | Pvc26        | Pvc30 | Pvc78        | SGPv9 | SGPv10 | SGPv11 | SGPv16 |       |
| <b>Baltic Sea</b>  |              |       |              |              |       |              |        |              |              |       |              |       |              |       |        |        |        |       |
| $N$                | 20           | 21    | 18           | 21           | 21    | 21           | 20     | 21           | 21           | 21    | 21           | 21    | 20           | 21    | 21     | 21     | 21     | 21    |
| $A$                | 6            | 12    | 8            | 12           | 14    | 9            | 6      | 8            | 15           | 10    | 4            | 7     | 6            | 6     | 11     | 12     | 7      | 7     |
| $r$                | 0.286        | 0.048 | 0.217        | 0.000        | 0.000 | 0.000        | 0.000  | 0.000        | 0.000        | 0.000 | 0.001        | 0.000 | 0.000        | 0.015 | 0.038  | 0.000  | 0.005  | 9.000 |
| $H_O$              | 0.150        | 0.762 | 0.389        | 0.857        | 0.905 | 0.857        | 0.800  | 0.810        | 0.952        | 0.762 | 0.667        | 0.857 | 0.750        | 0.667 | 0.762  | 0.857  | 0.810  | 0.742 |
| $H_E$              | 0.608        | 0.905 | 0.765        | 0.863        | 0.870 | 0.813        | 0.681  | 0.816        | 0.921        | 0.779 | 0.721        | 0.819 | 0.703        | 0.725 | 0.840  | 0.861  | 0.833  | 0.795 |
| $P$                | <b>0.000</b> | 0.104 | <b>0.000</b> | 0.314        | 0.930 | 0.313        | 0.367  | 0.724        | 0.824        | 0.636 | 0.274        | 0.450 | 1.000        | 0.881 | 0.180  | 0.860  | 0.266  |       |
| <b>Lake Ladoga</b> |              |       |              |              |       |              |        |              |              |       |              |       |              |       |        |        |        |       |
| $N$                | 16           | 16    | 16           | 16           | 16    | 16           | 16     | 16           | 16           | 16    | 16           | 16    | 16           | 16    | 16     | 16     | 16     | 16    |
| $A$                | 7            | 8     | 7            | 9            | 11    | 10           | 4      | 6            | 15           | 7     | 4            | 8     | 6            | 5     | 10     | 7      | 6      | 6     |
| $r$                | 0.276        | 0.096 | 0.181        | 0.000        | 0.000 | 0.000        | 0.000  | 0.016        | 0.005        | 0.000 | 0.000        | 0.029 | 0.000        | 0.000 | 0.012  | 0.001  | 0.000  | 7.647 |
| $H_O$              | 0.313        | 0.563 | 0.375        | 0.875        | 0.813 | 1.000        | 0.563  | 0.750        | 0.875        | 0.813 | 0.688        | 0.750 | 0.750        | 0.250 | 0.875  | 0.625  | 0.875  | 0.036 |
| $H_E$              | 0.831        | 0.798 | 0.698        | 0.804        | 0.839 | 0.877        | 0.542  | 0.810        | 0.940        | 0.675 | 0.599        | 0.823 | 0.698        | 0.238 | 0.865  | 0.728  | 0.752  | 0.691 |
| $P$                | <b>0.000</b> | 0.066 | <b>0.001</b> | 0.987        | 0.452 | 0.810        | 1.000  | 0.656        | <b>0.017</b> | 0.646 | 0.899        | 0.235 | 0.702        | 1.000 | 0.240  | 0.910  | 0.170  | 0.736 |
| <b>Lake Saimaa</b> |              |       |              |              |       |              |        |              |              |       |              |       |              |       |        |        |        |       |
| $N$                | 172          | 172   | 172          | 172          | 172   | 172          | 172    | 172          | 171          | 172   | 171          | 170   | 172          | 172   | 172    | 172    | 172    | 172   |
| $A$                | 2            | 2     | 3            | 3            | 2     | 3            | 2      | 3            | 16           | 4     | 4            | 4     | 2            | 2     | 2      | 3      | 2      | 2     |
| $r$                | 0.049        | 0.025 | 0.047        | 0.053        | 0.040 | 0.069        | 0.000  | 0.064        | 0.012        | 0.013 | 0.027        | 0.007 | 0.083        | 0.000 | 0.000  | 0.000  | 0.011  | 3.471 |
| $H_O$              | 0.012        | 0.262 | 0.448        | 0.517        | 0.035 | 0.436        | 0.297  | 0.105        | 0.673        | 0.477 | 0.234        | 0.618 | 0.203        | 0.192 | 0.459  | 0.599  | 0.110  | 0.029 |
| $H_E$              | 0.023        | 0.285 | 0.536        | 0.548        | 0.046 | 0.550        | 0.285  | 0.141        | 0.734        | 0.495 | 0.236        | 0.633 | 0.285        | 0.174 | 0.434  | 0.612  | 0.115  | 0.334 |
| $P$                | <b>0.018</b> | 0.287 | <b>0.006</b> | <b>0.000</b> | 0.080 | <b>0.008</b> | 0.789  | <b>0.007</b> | <b>0.006</b> | 0.180 | <b>0.033</b> | 0.240 | <b>0.001</b> | 0.370 | 0.483  | 0.637  | 0.477  | 0.361 |

(a)

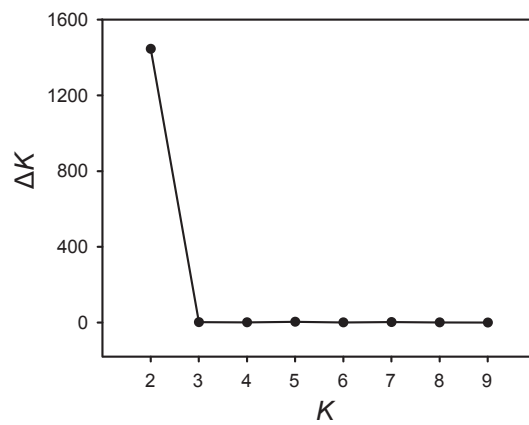

(b)

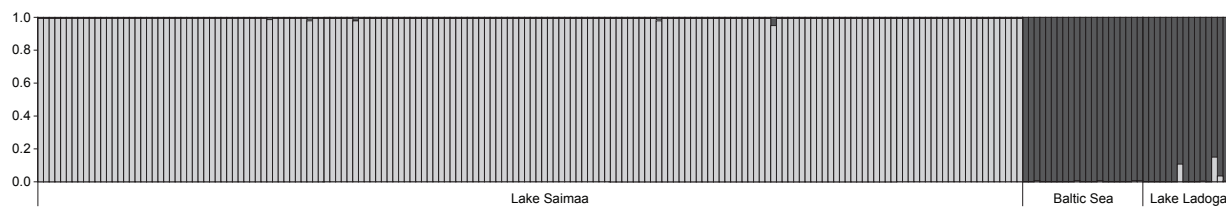

**Fig. S1** (a)  $\Delta K$  values for each number of  $K$  from STRUCTURE runs, and (b) assignment of Saimaa, Ladoga, and Baltic ringed seal individuals into two population clusters in STRUCTURE.

Scenario CB-NRB

Effective population sizes after colonization bottlenecks

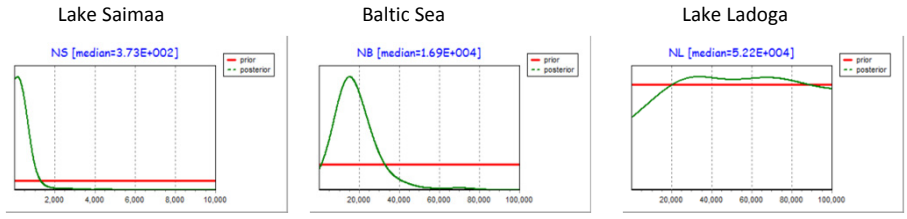

Effective population sizes during colonization bottlenecks

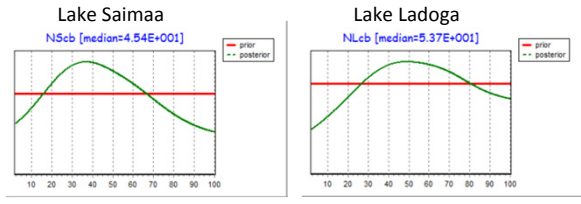

Duration of colonization bottlenecks

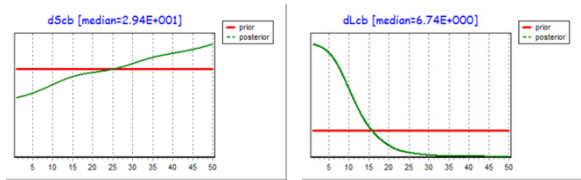

Colonization times

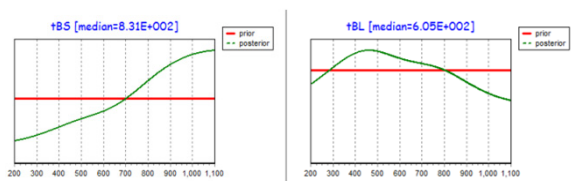

Mutation-model parameters

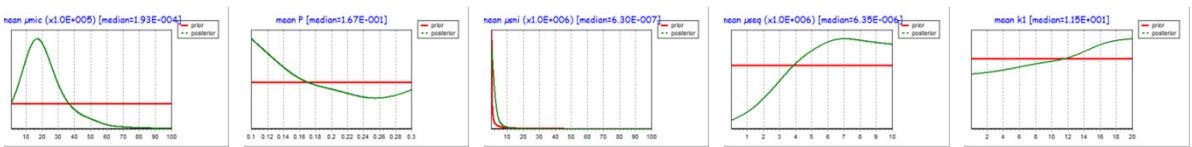

**Fig. S2** Prior (red lines) and posterior (green lines) distributions of event-time and demographic parameters in three Fennoscandian ringed seal subspecies according to the second-best scenario (CB-NRB), and estimates of mutation-model parameters for microsatellites and mtDNA sequences (inset).

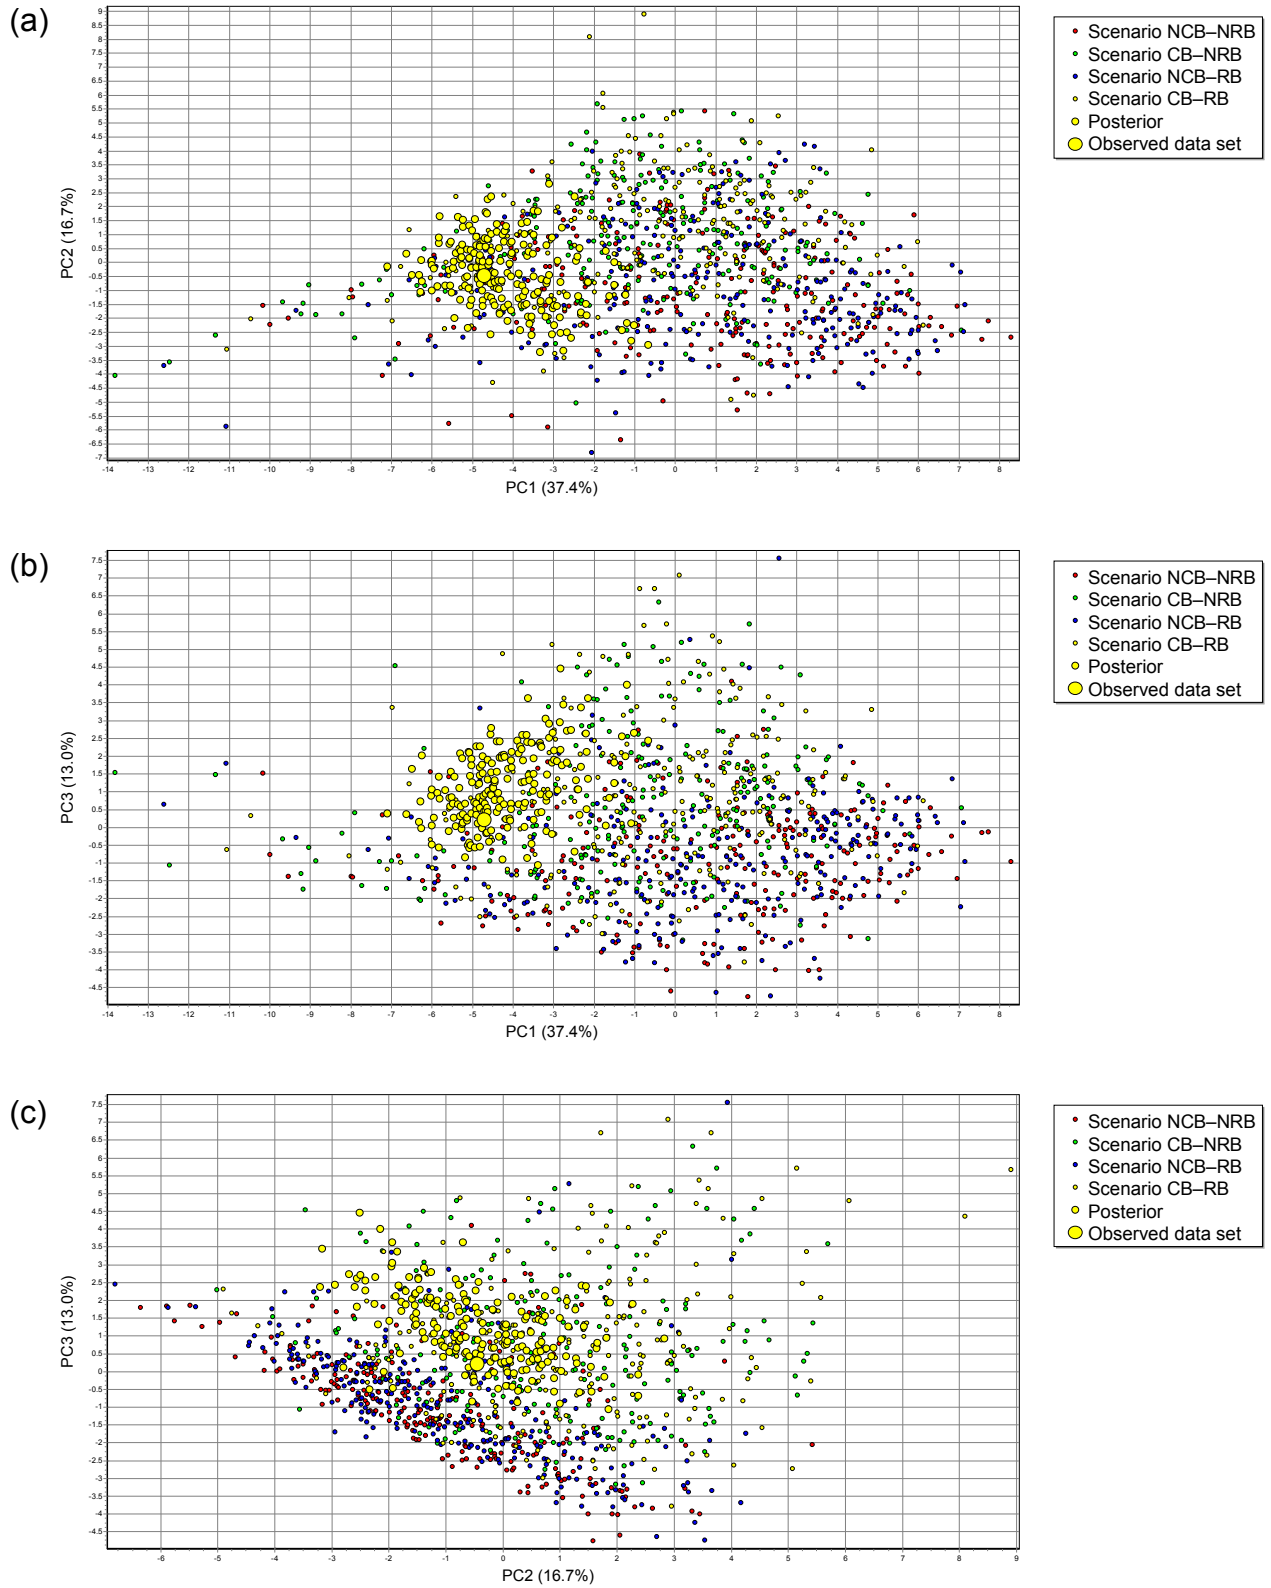

**Fig. S3** PCA plots (first three axes) from a model-checking analysis based on alternative target statistics and datasets simulated using parameter values drawn from the posterior distributions from Scenario CB-RB.



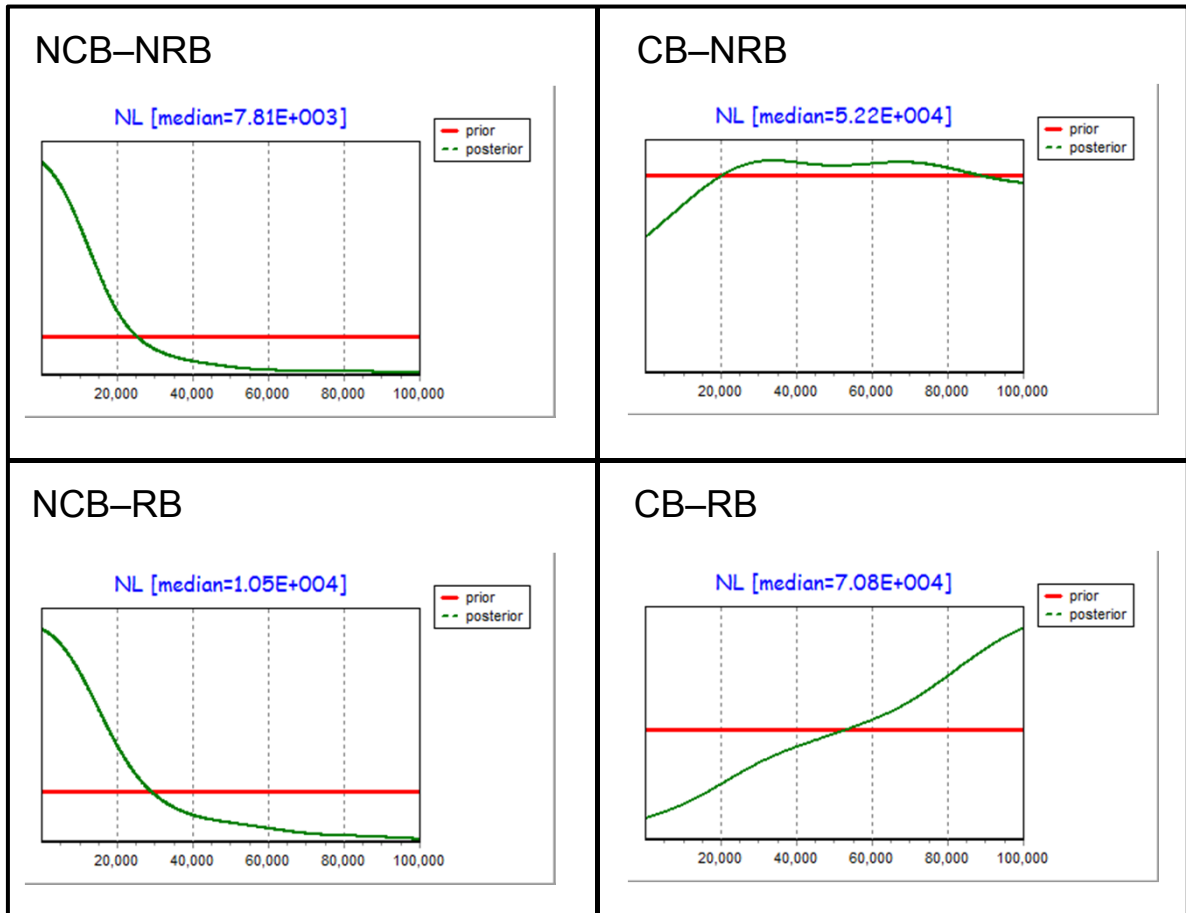

**Fig. S4** Prior (red lines) and posterior (green lines) distributions for effective population size in Ladoga ringed seals in each of the four scenarios evaluated in the ABC analyses.
